# Supplementary material for: Prognostic value of bioelectrical impedance analysis in head and neck cancer patients undergoing radiotherapy: a VALOR® study
Source: PubMed Central journal article supplement (PMC10921554; doi:10.3389/fnut.2024.1335052), 2024-02-22

**Supplementary Figure S1.** Correlation plots are presented to show association between body composition (X-axis) and cancer complications related to head and neck cancer (Y-axis) of males. Pearson's correlation was conducted and asterisk indicates significant correlation between variables according to the Pearson's correlation test (\* $p < 0.05$ ). **Abbreviations:** BCM: Body cell mass; BCMI: BCM index; FFMI: Fat-free mass index; FM: Fat mass; FMI: FM index; OR: Odds ratio; PA: Phase angle; SMI: skeletal muscle index; SPA: Standardized PA.

**Supplementary Figure S2.** Correlation plots are presented to show association between body composition (X-axis) and cancer complications related to head and neck cancer (Y-axis) of females. Pearson's correlation was conducted and asterisk indicates significant correlation between variables according to the Pearson's correlation test (\* $p < 0.05$ ). **Abbreviations:** BCM: Body cell mass; BCMI: BCM index; FFMI: Fat-free mass index; FM: Fat mass; FMI: FM index; OR: Odds ratio; PA: Phase angle; SMI: skeletal muscle index; SPA: Standardized PA.

**Supplementary Figure S3.** Random forest and Decision tree of variable to predict mortality in males. (A) Decision tree performed with the most important variable in the model. (B) Table to calculate the precision of the model. (C) Random forest analysis to predict the importance of variables, presented as gain. **Abbreviations:** AUC: area under curve; BCM: Body cell mass; BCMI: BCM index; FFMI: Fat-free mass index; FM: Fat mass; FMI: FM index; OR: Odds ratio; PA: Phase angle; SMI: skeletal muscle index; SPA: Standardized PA.

**Supplementary Figure S4.** Random forest and Decision tree of variable to predict mortality in females. (A) Decision tree performed with the most important variable in the model. (B) Table to calculate the precision of the model. (C) Random forest analysis to predict the importance of variables, presented as gain. **Abbreviations:** AUC: area under curve; BCM: Body cell mass; BCMI: BCM index; FFMI: Fat-free mass index; FM: Fat mass; FMI: FM index; OR: Odds ratio; PA: Phase angle; SMI: skeletal muscle index; SPA: Standardized PA.

**Supplementary Figure S5.** Kaplan-Meier curves for the variables included in the study. (A) Kaplan-Meier curve cell mass index. (B): Kaplan-Meier curve skeletal mass index; (C) Kaplan-Meier curve fat free mass index (D): Kaplan-Meier curve phase angle; (E): Kaplan-Meier curve phase angle; (F): Kaplan-Meier curve fat mass; (G): Kaplan-Meier curve fat mass index **Abbreviations:** BCM: Body cell mass; BCMI: BCM index; FFMI: Fat-free mass index; FM: Fat mass; FMI: FM index; OR: Odds ratio; PA: Phase angle; SMI: skeletal muscle index; SPA: Standardized PA.



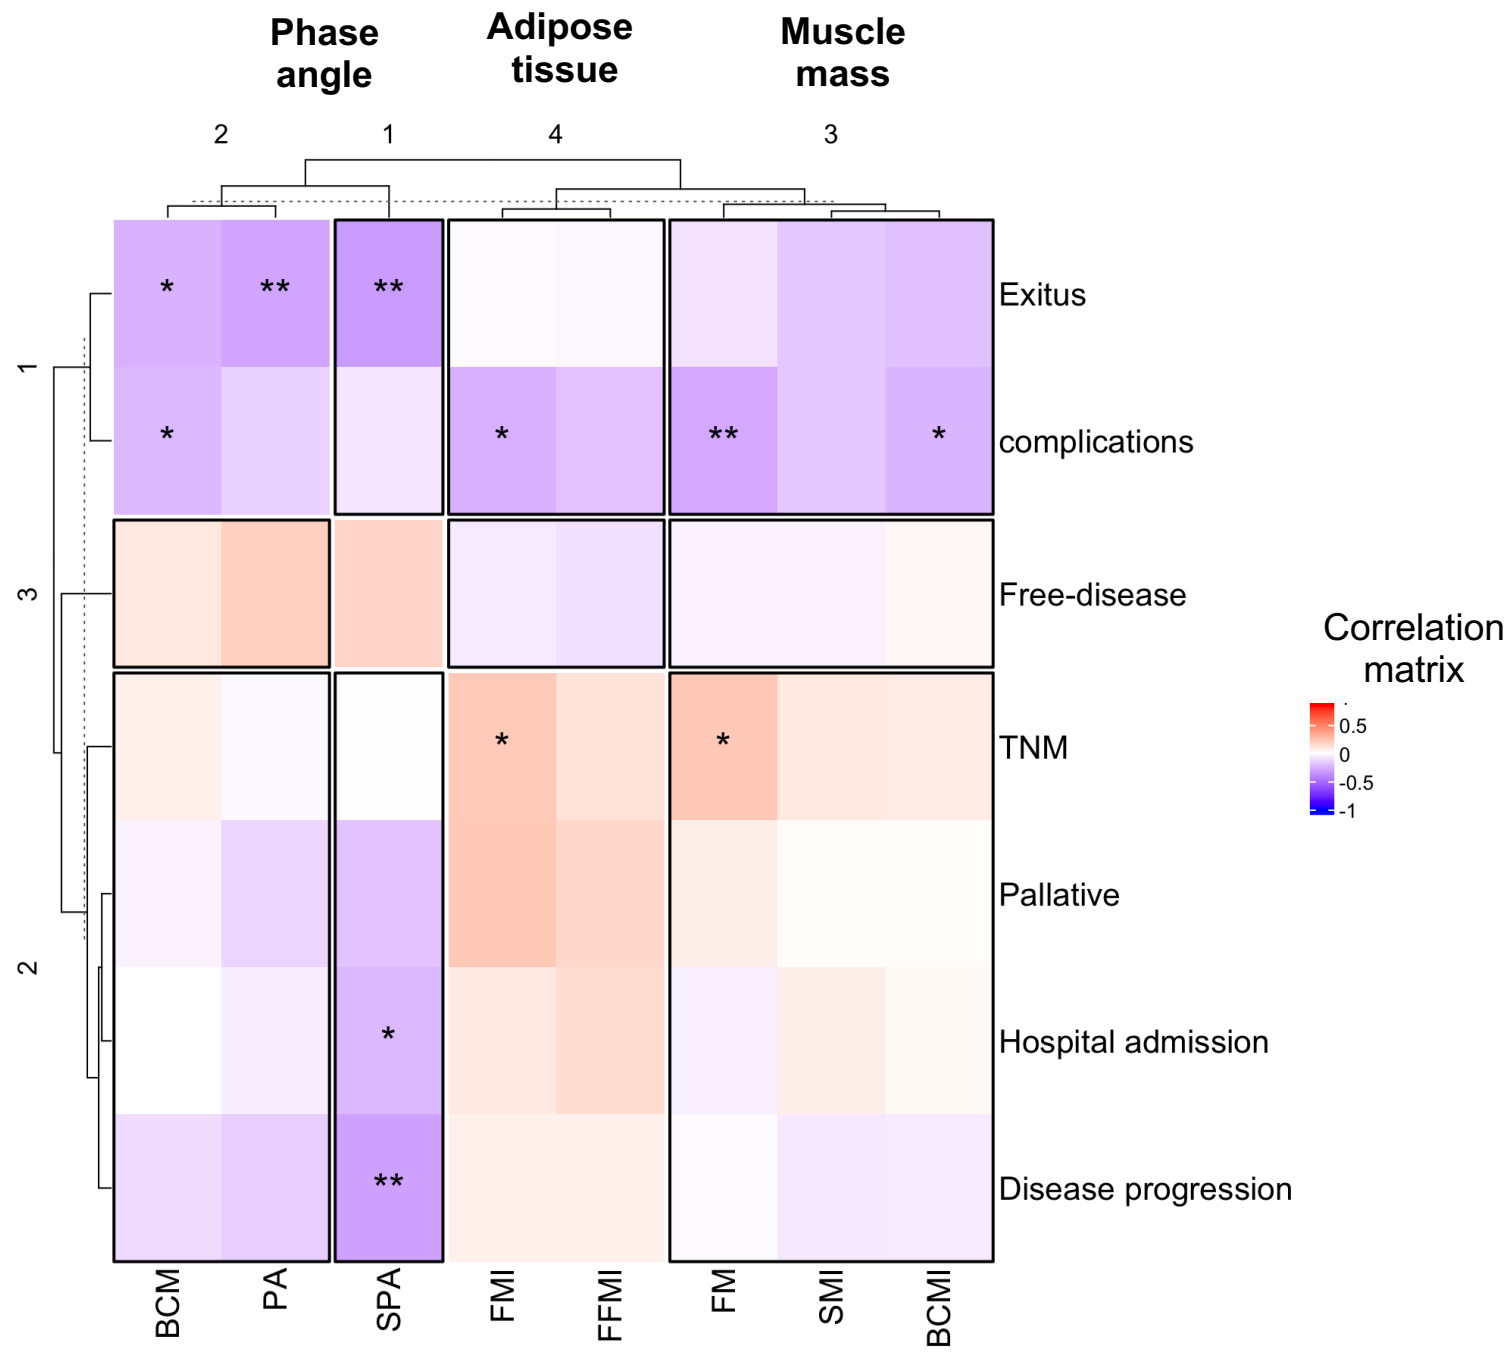

A)

Risk of mortality

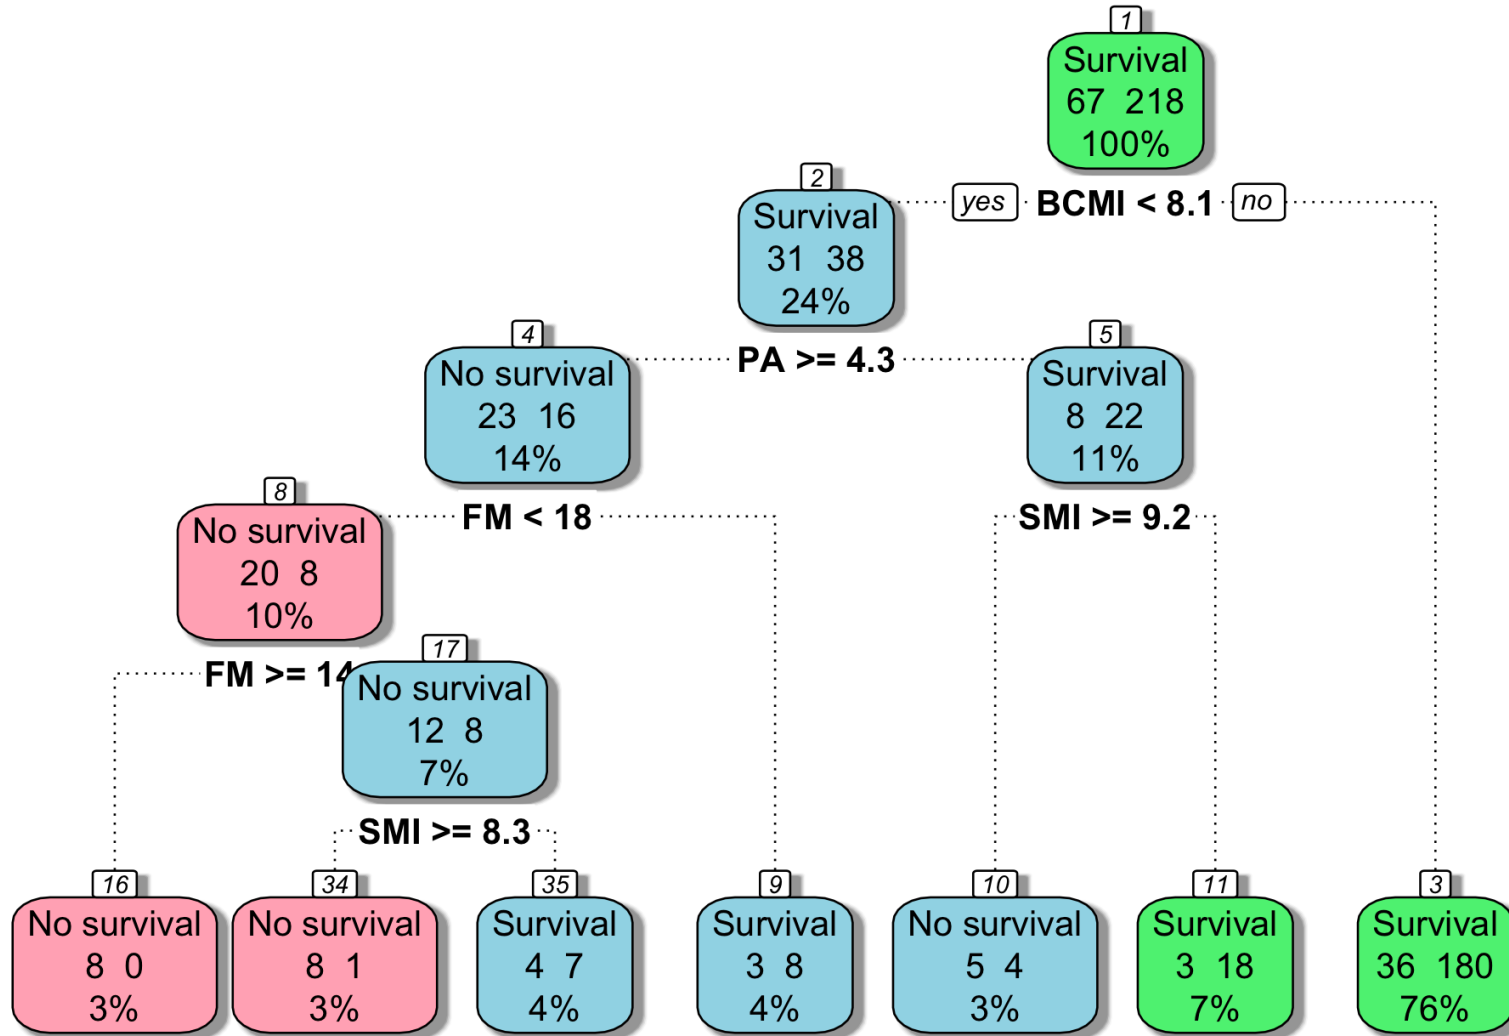

B)

|          |              | Predicted   |          |
|----------|--------------|-------------|----------|
|          |              | No-survival | Survival |
| Observed | Non-Survival | 21          | 5        |
|          | Survival     | 46          | 213      |

Accuracy CI 95%: 0.821 (0.771 – 0.864)  
 Kappa: 0.369  
 p=0.013  
 AUC: 0.597

C)

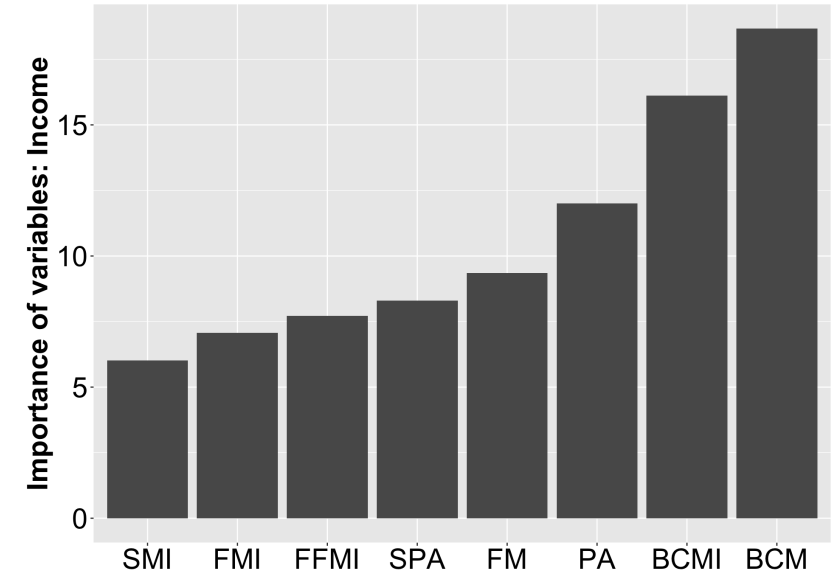

A)

Risk of mortality

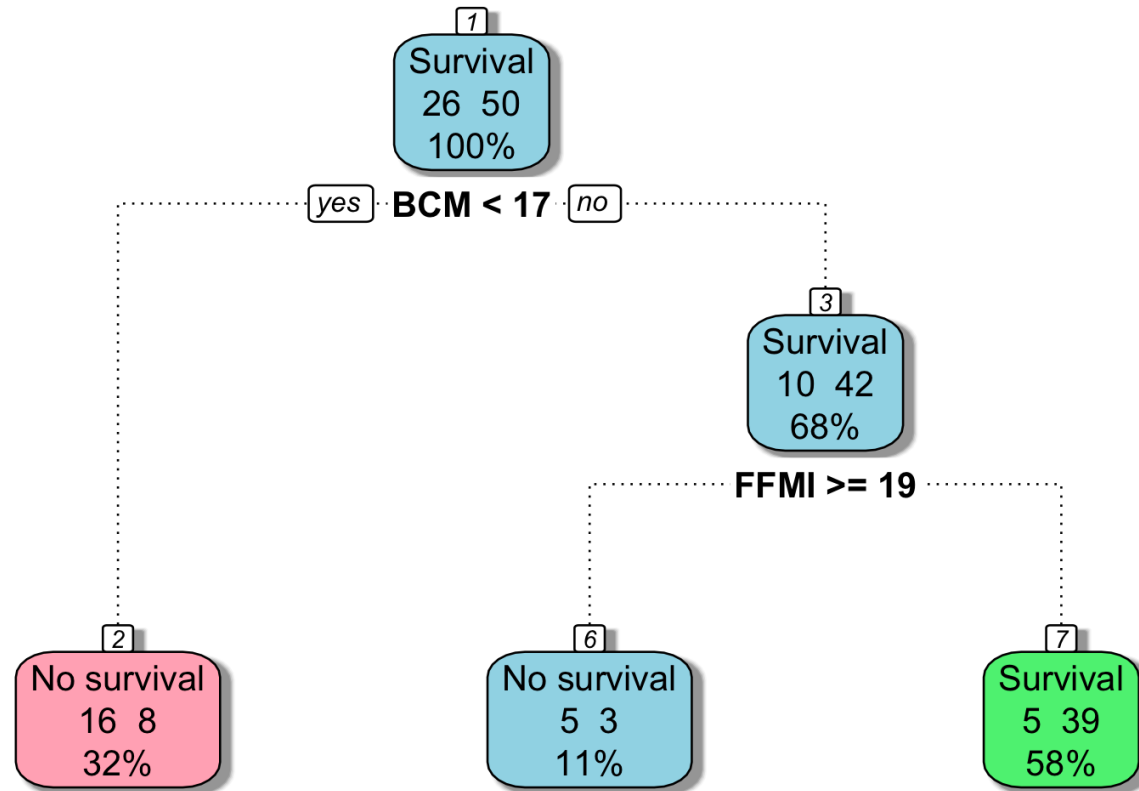

B)

|                                                                                 |              | Predicted   |          |
|---------------------------------------------------------------------------------|--------------|-------------|----------|
|                                                                                 |              | No-survival | Survival |
| Observed                                                                        | Non-Survival | 21          | 11       |
|                                                                                 | Survival     | 5           | 39       |
| Accuracy CI 95%: 0.789 (0.681 – 0.875)<br>Kappa: 0.557<br>p=0.009<br>AUC: 0.720 |              |             |          |

C)

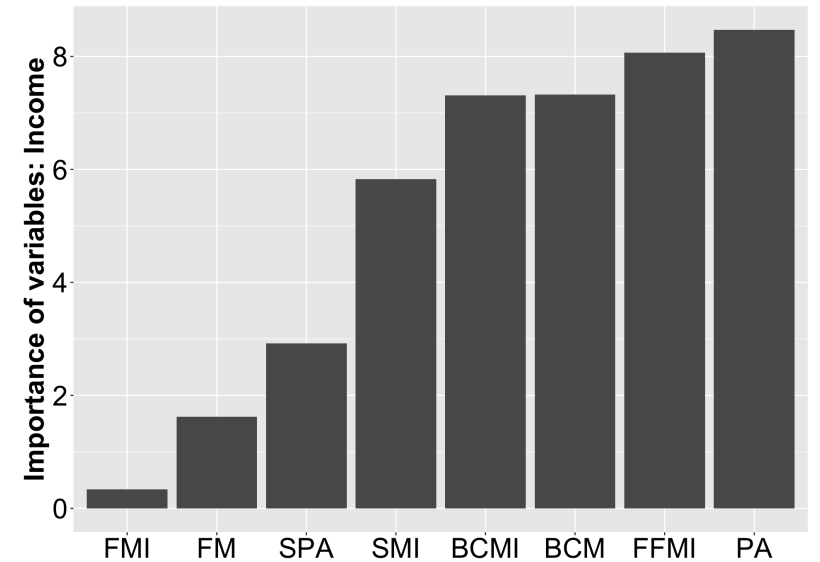

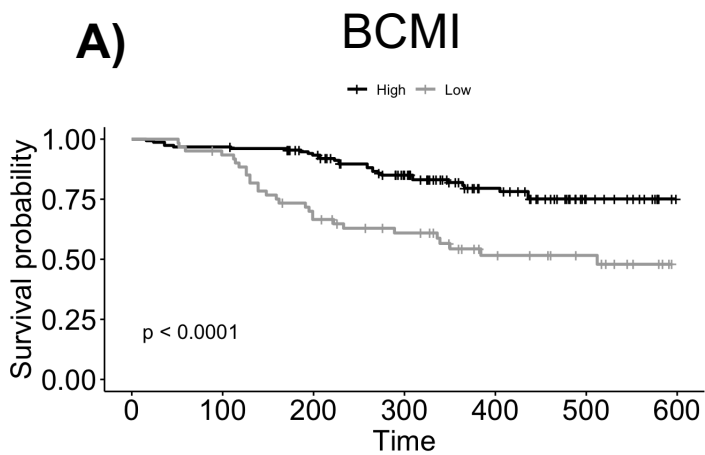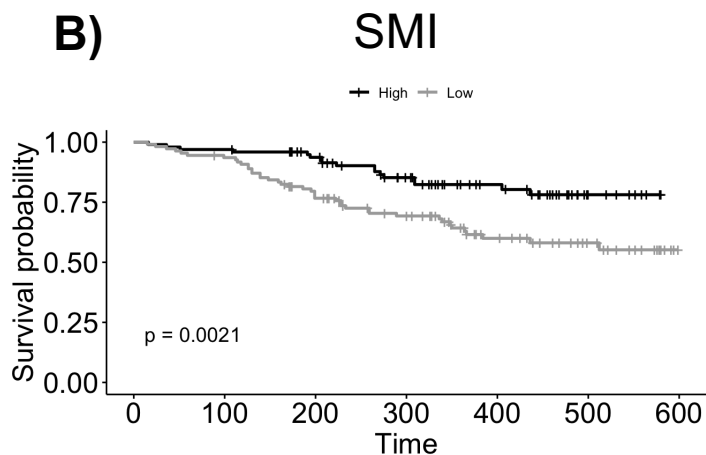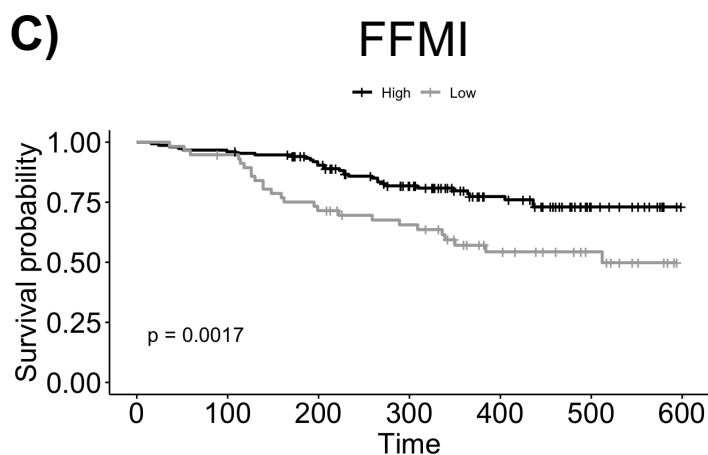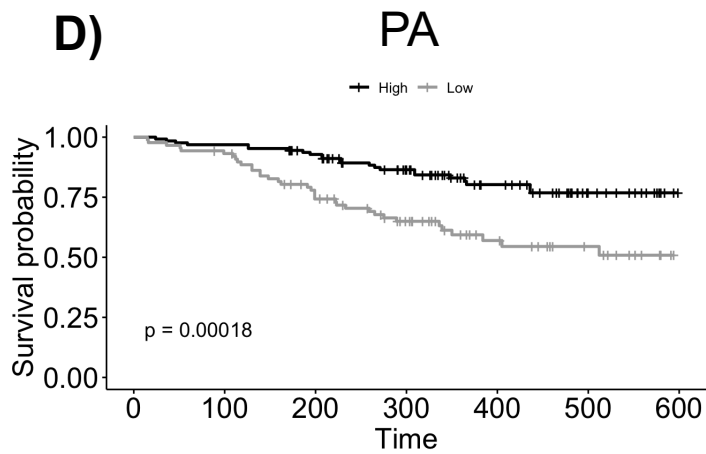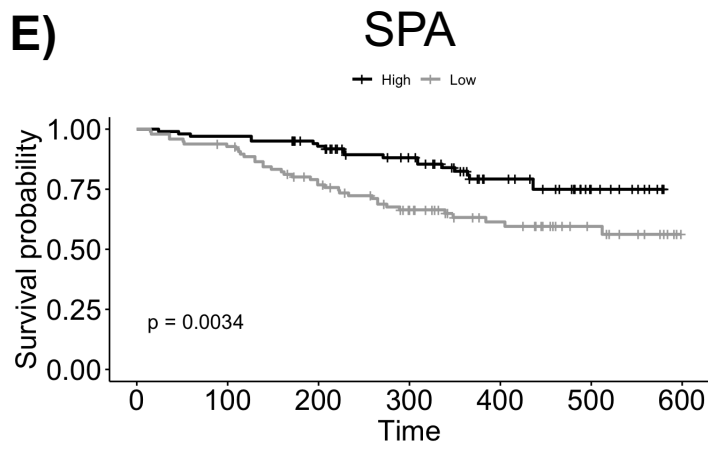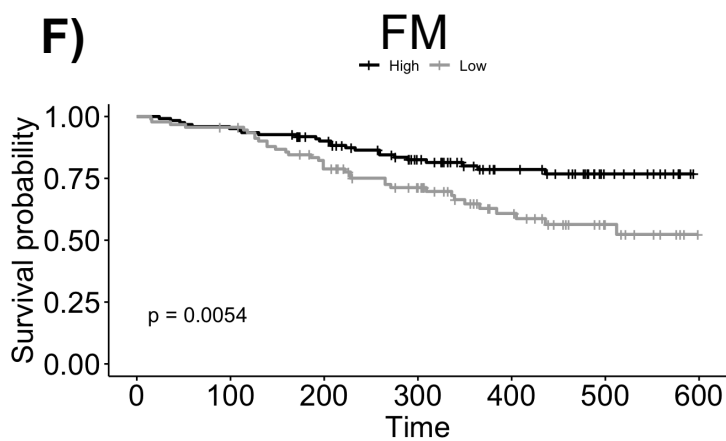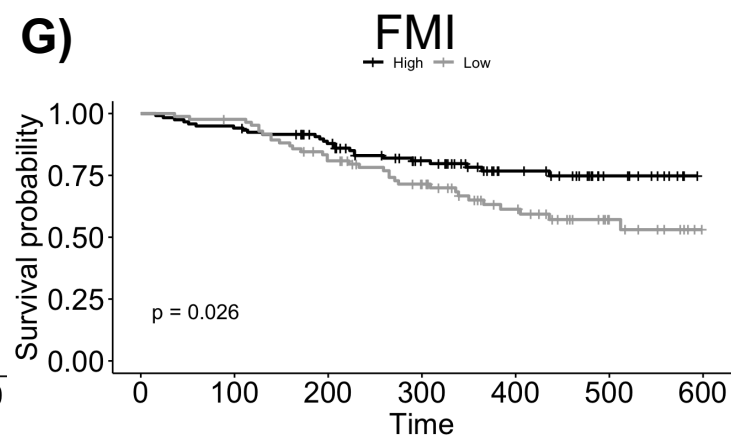

Supplement: Data_Sheet_1.pdf [file Data_Sheet_1.pdf]
